# Supplementary material for: Elements of Trust in Digital Health Systems: Scoping Review
Source: PubMed Central journal article supplement (PMC6315261; doi:10.2196/11254), 2018-12-13
Supplement: jmir_v20i12e11254_app3.pdf [file jmir_v20i12e11254_app3.pdf]

### Appendix 3: List of Study Countries

| Country        | Total Number of Articles |
|----------------|--------------------------|
| Australia      | 16                       |
| Austria        | 1                        |
| Bangladesh     | 1                        |
| Canada         | 15                       |
| China          | 8                        |
| Czech Republic | 1                        |
| Denmark        | 2                        |
| European Union | 1                        |
| Finland        | 2                        |
| France         | 1                        |
| Gambia         | 1                        |
| Germany        | 4                        |
| Greece         | 1                        |
| Guatemala      | 1                        |
| Ireland        | 3                        |
| Israel         | 1                        |
| Italy          | 1                        |
| Iran           | 1                        |
| Japan          | 2                        |
| Latvia         | 1                        |
| Malawi         | 1                        |
| Mexico         | 1                        |
| Mozambique     | 1                        |
| Nepal          | 1                        |
| Netherlands    | 6                        |
| New Zealand    | 2                        |
| Norway         | 10                       |
| Poland         | 1                        |
| Portugal       | 1                        |
| Romania        | 1                        |
| South Africa   | 5                        |
| South Korea    | 1                        |
| Spain          | 4                        |
| Sri Lanka      | 1                        |
| Sweden         | 12                       |
| Switzerland    | 1                        |
| Taiwan         | 8                        |
| Tanzania       | 1                        |
| Uganda         | 1                        |
| United Kingdom | 47                       |
| United States  | 101                      |
